# Supplementary material for: Cu(ii) coordinated N-bearing heteropolyacid-based poly(ionic liquid)s for allylic oxidation of cyclohexene to 2-cyclohexene-1-one with O2under mild conditions
Source: Royal Society of Chemistry journal article supplement (doi:10.1039/d2nj05607k), 2023-01-01
Supplement: d2nj05607k1.pdf [file d2nj05607k1.pdf]

## Supplementary Information

# **Cu (II) coordinated N-bearing heteropolyacid-based poly(ionic liquid)s for allylic oxidation of cyclohexene to 2-cyclohexene-1-one with O<sub>2</sub> under mild conditions**

Binxiong Guang,<sup>a,b</sup> Yiwei Zhang,<sup>b</sup> Yahui Xiao,<sup>\*b</sup> Miaojun Su,<sup>a,b</sup> Yong Liu<sup>\*a</sup>

<sup>a</sup> *Henan Key Laboratory of Polyoxometalate Chemistry, College of Chemistry and Chemical Engineering, Henan University, Kaifeng, 475004, China*

<sup>b</sup> *Henan Engineering Research Center of Resource & Energy Recovery from Waste, College of Chemistry and Chemical Engineering, Henan University, Kaifeng 475004, China*

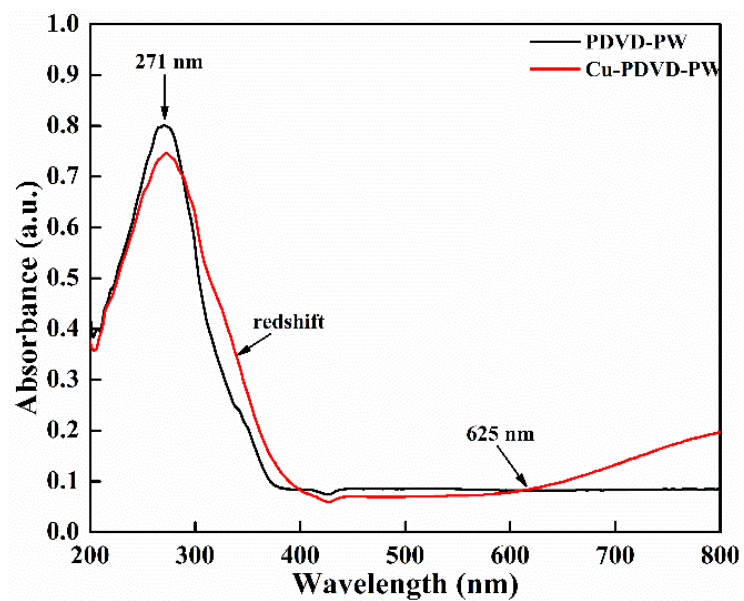

Fig. S1 The UV-vis absorption spectra of the PDVD-PW and Cu-PDVD-PW.

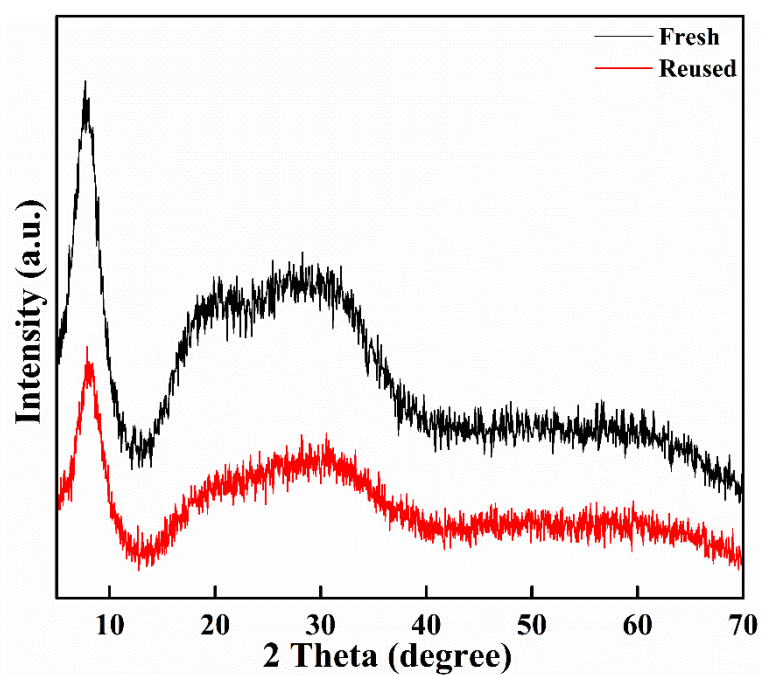

Fig. S2 The XRD patterns of the 3 % Cu-PDVD-PW catalyst before and after reaction
